# Supplementary material for: Multimorbidity and healthcare utilization among home care clients with dementia in Ontario, Canada: A retrospective analysis of a population-based cohort
Source: PLOS journal article supplement (doi:10.1371/journal.pmed.1002249), 2017-03-07
Supplement: S5 (10.1371/journal.pmed.1002249.s005) [file journal.pmed.1002249.s005]

S2 Table. List of diagnostic information for defining dementia and the 16 selected chronic conditions under investigation in this study.

These conditions represent a subset of all possible chronic conditions that may be experienced by individuals over a lifetime but represent the most substantial conditions from a population perspective.

| Condition                                                                                                                                                                                                                | ICD 9 / OHIP                                                                                        | ICD 10                                                | ODB*                      |
|--------------------------------------------------------------------------------------------------------------------------------------------------------------------------------------------------------------------------|-----------------------------------------------------------------------------------------------------|-------------------------------------------------------|---------------------------|
| Acute Myocardial Infarction (AMI)                                                                                                                                                                                        | 410                                                                                                 | I21, I22                                              |                           |
| Osteo- and other Arthritis:                                                                                                                                                                                              |                                                                                                     |                                                       |                           |
| (A) Osteoarthritis                                                                                                                                                                                                       | 715                                                                                                 | M15-M19                                               |                           |
| (B) Other Arthritis (includes Synovitis, Fibrositis, Connective tissue disorders, Ankylosing spondylitis, Gout Traumatic arthritis, pyogenic arthritis, Joint derangement, Dupuytren's contracture, Other MSK disorders) | 727, 729, 710, 720, 274, 716, 711, 718, 728, 739                                                    | M00-M03, M07, M10, M11-M14, M20-M25, M30-M36, M65-M79 |                           |
| Arthritis - Rheumatoid arthritis                                                                                                                                                                                         | 714                                                                                                 | M05-M06                                               |                           |
| Asthma                                                                                                                                                                                                                   | 493                                                                                                 | J45                                                   |                           |
| (all) Cancers                                                                                                                                                                                                            | 140-239                                                                                             | C00-C26, C30-C44, C45-C97                             |                           |
| Cardiac Arrhythmia                                                                                                                                                                                                       | 427 (OHIP) / 427.3 (DAD)                                                                            | I48.0, I48.1                                          |                           |
| Congestive Heart Failure                                                                                                                                                                                                 | 428                                                                                                 | I500, I501, I509                                      |                           |
| Chronic Obstructive Pulmonary Disease                                                                                                                                                                                    | 491, 492, 496                                                                                       | J41, J43, J44                                         |                           |
| Coronary syndrome (excluding AMI)                                                                                                                                                                                        | 411-414                                                                                             | I20, I22-I25                                          |                           |
| Dementia                                                                                                                                                                                                                 | 290, 331 (OHIP) / 046.1, 290.0, 290.1, 290.2, 290.3, 290.4, 294, 331.0, 331.1, 331.5, F331.82 (DAD) | F00, F01, F02, F03, G30                               | Cholinesterase Inhibitors |
| Diabetes                                                                                                                                                                                                                 | 250                                                                                                 | E08 - E13                                             |                           |
| Hypertension                                                                                                                                                                                                             | 401, 402, 403, 404, 405                                                                             | I10, I11, I12, I13, I15                               |                           |

|                                                            |                                                                                     |                                                                                                                                                                                                                                                                                                                                                                                                                                                                                                                                       |
|------------------------------------------------------------|-------------------------------------------------------------------------------------|---------------------------------------------------------------------------------------------------------------------------------------------------------------------------------------------------------------------------------------------------------------------------------------------------------------------------------------------------------------------------------------------------------------------------------------------------------------------------------------------------------------------------------------|
| (Other) Mental Illnesses                                   | 291, 292, 295, 297, 298, 299, 301, 302, 303, 304, 305, 306, 307, 313, 314, 315, 319 | F04, F050, F058, F059, F060, F061, F062, F063, F064, F07, F08, F10, F11, F12, F13, F14, F15, F16, F17, F18, F19, F20, F21, F22, F23, F24, F25, F26, F27, F28, F29, F340, F35, F36, F37, F430, F439, F453, F454, F458, F46, F47, F49, F50, F51, F52, F531, F538, F539, F54, F55, F56, F57, F58, F59, F60, F61, F62, F63, F64, F65, F66, F67, F681, F688, F69, F70, F71, F72, F73, F74, F75, F76, F77, F78, F79, F80, F81, F82, F83, F84, F85, F86, F87, F88, F89, F90, F91, F92, F931, F932, F933, F938, F939, F94, F95, F96, F97, F98 |
| Mood, anxiety, depression and other nonpsychotic disorders | 296, 300, 309, 311                                                                  | F30, F31, F32, F33, F34 (excl. F34.0), F38, F39, F40, F41, F42, F43.1, F43.2, F43.8, F44, F45.0, F45.1, F45.2, F48, F53.0, F68.0, F93.0, F99                                                                                                                                                                                                                                                                                                                                                                                          |
| Osteoporosis                                               | 733                                                                                 | M81, M82                                                                                                                                                                                                                                                                                                                                                                                                                                                                                                                              |
| Renal failure                                              | 403, 404, 584, 585, 586, v451                                                       | N17, N18, N19, T82.4, Z49.2, Z99.2                                                                                                                                                                                                                                                                                                                                                                                                                                                                                                    |
| Stroke (excluding transient ischemic attack)               | 430, 431, 432, 434, 436                                                             | I60-I64                                                                                                                                                                                                                                                                                                                                                                                                                                                                                                                               |

NOTES:

Abbreviations: ICD = International Classification of Disease; ODB = Ontario Drug Benefit program database; OHIP = Ontario Health Insurance Plan, physician billings database;

All case definitions look back to 2001 to ascertain disease status, with the exception of AMI (1 year prior to RAI-HC assessment), Cancer (2 years), Mood Disorder (2 years) and Other Mental Illnesses (2 years)

AMI, Asthma, COPD, CHF, Dementia, Diabetes and Hypertension are based on validated case algorithms (see Sources 1-7 below, respectively). All other conditions required at least one diagnosis recorded in acute care (CIHI) or two diagnoses recorded in physician billings within a two-year period. Dementia, however, required at least one acute record, three or more physician billings within 2 years and separated by 30 days or more, or any prescription dispensing of a cholinesterase inhibitor (see Reference 24 of manuscript)

\*ODB prescription drug records are not available for the majority of persons under the age of 65

Sources:

1. Austin PC, Daly PA, Tu JV. A multicenter study of the coding accuracy of hospital discharge administrative data for patients admitted to cardiac care units in Ontario. *American Heart Journal* 2002;144:290–6.
2. Gershon AS, Wang C, Guan J, Vasilevska-Ristovska J, Cicutto L, To T. Identifying patients with physician-diagnosed asthma in health administrative databases. *Can Respir J* 2009;16:183–8.
3. Gershon AS, Wang C, Guan J, Vasilevska-Ristovska J, Cicutto L, To T. Identifying Individuals with Physician Diagnosed COPD in Health Administrative Databases. *Copd* 2009;6:388–94.
4. Schultz SE, Rothwell DM, Chen Z, Tu K. Identifying cases of congestive heart failure from administrative data: a validation study using primary care patient records. *Chronic Diseases and Injuries in Canada* 2013;33:160–6.
5. Jaakkimainen RL, Bronskill SE, Tierney MC, Herrmann N, Green D, Young J, et al. Identification of Physician-Diagnosed Alzheimer’s Disease and Related Dementias in Population-Based Administrative Data: A Validation Study Using Family Physicians’ Electronic Medical Records. *J Alzheimers Dis. IOS Press*; 2016 Aug 10;54(1):337–49
6. Hux JE, Ivis F, Flintoft V, Bica A. Diabetes in Ontario: Determination of prevalence and incidence using a validated administrative data algorithm. *Diabetes Care* 2002;25:512–6.
7. Tu K, Campbell NR, Chen Z-L, Cauch-Dudek KJ, McAlister FA. Accuracy of administrative databases in identifying patients with hypertension. *Open Med* 2007;1:e18–26.
