# Supplementary material for: Multimorbidity and healthcare utilization among home care clients with dementia in Ontario, Canada: A retrospective analysis of a population-based cohort
Source: PLOS journal article supplement (doi:10.1371/journal.pmed.1002249), 2017-03-07
Supplement: S6 (10.1371/journal.pmed.1002249.s006) [file journal.pmed.1002249.s006]

S3 Table. Counts per study inclusion criterion

| <b>Step</b> | <b>Inclusion criteria</b>                                    | <b>Records Excluded (n)</b> | <b>Cohort Remaining (n)</b> |
|-------------|--------------------------------------------------------------|-----------------------------|-----------------------------|
| 1           | RAI-HC assessments between January and June 2012             | n/a                         | 131,845                     |
| 2           | Valid OHIP card number and eligible for (OHIP) coverage      | 51                          | 131,794                     |
| 3           | Between 50 and 105 years of age                              | 5,874                       | 125,920                     |
| 4           | Records with data quality issues                             | 124                         | 125,796                     |
| 5           | Resident of Ontario                                          | 37                          | 125,759                     |
| 6           | One assessment per home care client (closest to Apr 1, 2012) | 16,326                      | 109,433                     |
| 7           | Diagnosed with dementia at time of RAI-HC assessment         | 79,321                      | 30,112                      |
