# Supplementary material for: Multimorbidity and healthcare utilization among home care clients with dementia in Ontario, Canada: A retrospective analysis of a population-based cohort
Source: PLOS journal article supplement (doi:10.1371/journal.pmed.1002249), 2017-03-07
Supplement: S7 (10.1371/journal.pmed.1002249.s007) [file journal.pmed.1002249.s007]

S4 Table. Prevalence of 16 chronic conditions by level of multimorbidity

|                                     | <b>Overall</b> | <b>0-1 CC</b> | <b>2 CC</b>   | <b>3 CC</b>   | <b>4 CC</b>   | <b>5+ CC</b>   |
|-------------------------------------|----------------|---------------|---------------|---------------|---------------|----------------|
| <b>Variable</b>                     | N=30,112       | N=3,309       | N=4,799       | N=5,847       | N=5,589       | N=10,568       |
| <b>Prevalent Chronic Conditions</b> |                |               |               |               |               |                |
| Hypertension                        | 24,812 (82.4%) | 1,166 (35.2%) | 3,467 (72.2%) | 4,944 (84.6%) | 5,093 (91.1%) | 10,142 (96.0%) |
| Osteo-arthritis                     | 17,977 (59.7%) | 468 (14.1%)   | 2,026 (42.2%) | 3,325 (56.9%) | 3,808 (68.1%) | 8,350 (79.0%)  |
| Diabetes Mellitus                   | 10,361 (34.4%) | 163 (4.9%)    | 824 (17.2%)   | 1,718 (29.4%) | 2,065 (36.9%) | 5,591 (52.9%)  |
| Chronic Coronary Syndrome           | 9,955 (33.1%)  | 68 (2.1%)     | 448 (9.3%)    | 1,200 (20.5%) | 1,889 (33.8%) | 6,350 (60.1%)  |
| Mood/ Anxiety Disorders             | 7,379 (24.5%)  | 177 (5.3%)    | 622 (13.0%)   | 1,141 (19.5%) | 1,469 (26.3%) | 3,970 (37.6%)  |
| Congestive Heart Failure            | 6,779 (22.5%)  | 17 (0.5%)     | 148 (3.1%)    | 507 (8.7%)    | 1,010 (18.1%) | 5,097 (48.2%)  |
| Cardiac Arrhythmia                  | 6,484 (21.5%)  | 38 (1.1%)     | 217 (4.5%)    | 648 (11.1%)   | 1,098 (19.6%) | 4,483 (42.4%)  |
| (any) Cancer                        | 5,448 (18.1%)  | 119 (3.6%)    | 454 (9.5%)    | 813 (13.9%)   | 1,090 (19.5%) | 2,972 (28.1%)  |
| COPD                                | 4,971 (16.5%)  | 56 (1.7%)     | 206 (4.3%)    | 455 (7.8%)    | 743 (13.3%)   | 3,511 (33.2%)  |
| Stroke                              | 4,598 (15.3%)  | 34 (1.0%)     | 258 (5.4%)    | 564 (9.6%)    | 908 (16.2%)   | 2,834 (26.8%)  |
| Asthma                              | 4,428 (14.7%)  | 38 (1.1%)     | 184 (3.8%)    | 445 (7.6%)    | 786 (14.1%)   | 2,975 (28.2%)  |
| Renal Failure                       | 4,263 (14.2%)  | 23 (0.7%)     | 112 (2.3%)    | 421 (7.2%)    | 703 (12.6%)   | 3,004 (28.4%)  |
| Osteoporosis                        | 4,175 (13.9%)  | 117 (3.5%)    | 404 (8.4%)    | 781 (13.4%)   | 856 (15.3%)   | 2,017 (19.1%)  |
| (other) Mental Health               | 3,084 (10.2%)  | 51 (1.5%)     | 179 (3.7%)    | 401 (6.9%)    | 548 (9.8%)    | 1,905 (18.0%)  |
| Rheumatoid Arthritis                | 1,317 (4.4%)   | 15 (0.5%)     | 44 (0.9%)     | 150 (2.6%)    | 260 (4.7%)    | 848 (8.0%)     |
| Acute Myocardial Infarction         | 352 (1.2%)     | suppr.        | suppr.        | 28 (0.5%)     | 30 (0.5%)     | 285 (2.7%)     |

Notes:

CC = Chronic Conditions, suppr. = Cell suppressed due to small size (<5);
